# 1 Enhanced neural tracking of the fundamental frequency of 2 the voice

3 **Jana Van Canneyt, Jan Wouters and Tom Francart**

4 ExpORL, Dep. of Neurosciences, KU Leuven, Herestraat 49 bus 721, 3000, Leuven, Belgium.

5 E-mail: [jana.vanconneyt@kuleuven.be](mailto:jana.vanconneyt@kuleuven.be), [jan.wouters@med.kuleuven.be](mailto:jan.wouters@med.kuleuven.be), [tom.francart@kuleuven.be](mailto:tom.francart@kuleuven.be)

6 **Abstract.** *Objective:* 'F0 tracking' is a novel method that investigates the neural processing of  
7 the fundamental frequency of the voice (f0) in continuous speech. Through linear modelling, a  
8 feature that reflects the stimulus f0 is predicted from the EEG data. Then, the neural response  
9 strength is evaluated through the correlation between the predicted and actual f0 feature. The  
10 aim of this study was to improve upon this 'f0 tracking' method by optimizing the f0 feature.

11 *Approach:* Specifically, we aimed to design a feature that approximates the expected EEG  
12 responses to the f0. We hypothesized that this would improve neural tracking results, because  
13 the more similar the feature and the neural response are, the easier it will be to reconstruct  
14 the one from the other. Two techniques were explored: a phenomenological model to simulate  
15 neural processing in the auditory periphery and a low-pass filter to approximate the effect of  
16 more central processing on the f0 response. Since these optimizations target different aspects  
17 of the auditory system, they were also applied in a cumulative fashion.

18 *Results:* Results obtained from EEG evoked by a Flemish story in 34 subjects indicated  
19 that both the use of the auditory model and the addition of the low-pass filter significantly  
20 improved the correlations between the actual and reconstructed feature. The combination  
21 of both strategies almost doubled the mean correlation over subjects, from 0.078 to 0.13.  
22 Moreover, canonical correlation analysis with the modelled feature revealed two distinct  
23 processes contributing to the f0 response: one driven by the compound activity of auditory  
24 nerve fibers with center frequency up to 8 kHz and one driven predominantly by the auditory  
25 nerve fibers with center frequency below 1 kHz.

26 *Significance:* The optimized f0 features developed in this study enhance the analysis of  
27 f0-tracking responses and facilitate future research and applications.

28 *Keywords:* Brainstem decoding, f0 tracking, Feature optimisation, Auditory modelling

29 **1. Introduction**

30 Traditionally, auditory-evoked potentials are evoked by short repetitive stimuli, but research is  
31 progressing towards the use of continuous speech stimuli. Experiments with these natural stimuli  
32 are more pleasant for subjects and yield detailed information on auditory processing in day-to-day  
33 communication (Hamilton and Huth, 2020). As part of this movement, researchers developed  
34 a framework to analyse neural responses to continuous speech based on linear decoding models  
35 (e.g. Mesgarani et al. (2009); Lalor and Foxe (2010); Ding and Simon (2012); Crosse et al. (2016);  
36 Vanthornhout et al. (2018)). A linear decoding model, or backward model, reconstructs a specific  
37 stimulus-related feature from a linear combination of multi-channel neural responses and their  
38 time-lagged versions (Mesgarani et al., 2009). These linear models can be constructed for various  
39 stimulus features and depending on the feature, different aspects of auditory processing can be  
40 targetted. In this study, we focus on brainstem-dominated responses to the fundamental frequency  
41 of the voice ( $f_0$ ) in continuous speech, or "f0-tracking", as described in Etard et al. (2019) and  
42 Van Canneyt et al. (2020b). Specifically, we aimed to optimize the feature that is used in these  
43 paradigms.

44 The performance of backward decoding models is evaluated based on the correlation between the  
45 reconstructed feature, derived from the EEG (or MEG), and the actual feature, derived from  
46 the stimulus. For f0-tracking, the actual feature is typically obtained by band-pass filtering the  
47 stimulus (or through empirical mode decomposition (Forte et al., 2017)). However, the EEG  
48 response is not a perfect reflection of the stimulus and therefore the EEG-derived feature and  
49 these stimulus-derived features cannot be expected to correlate perfectly. The EEG response  
50 is shaped by neural processes like adaptation, saturation, and refractory periods, which have  
51 been extensively studied and can be simulated with models of the auditory system. Moreover,  
52 researchers have studied the EEG response and its dependency on the evoking stimulus and defined  
53 important temporal and spectral response characteristics. The goal of this study was to use the  
54 available knowledge on phase-locked EEG responses to adjust the feature used for f0 tracking,  
55 such that it is more similar to what is expected from the EEG response. We hypothesized that  
56 this would improve the correlations obtained with linear modelling, as it would be easier to predict  
57 the feature from the EEG responses. Typically, correlations for f0-tracking responses are quite  
58 small, i.e. in the range of 0.03-0.08, so increasing these values is desired.

59 Two strategies were set out to optimize the f0 feature. In a first step, we aimed to account  
60 for a series of neural processes occurring in the auditory periphery. This included frequency-  
61 specific basilar membrane delays, adaptation effects and refractory effects in the primary auditory  
62 nerve fibers (ANF). For this purpose, we employed a phenomenological model of the auditory  
63 periphery (Carney, 1993; Zhang et al., 2001; Bruce et al., 2003; Zilany and Bruce, 2006, 2007;  
64 Zilany et al., 2009, 2014; Bruce et al., 2018). The model predicts neural firing patterns in a

65 large population of ANFs based on the input stimulus. By summing together the firing patterns  
66 over the ANFs, the response on the population level can be estimated. In a previous study, this  
67 population response has been found to accurately simulate phase-locked responses to stimulus  
68 envelope modulations (Van Canneyt et al., 2019). Since the  $f_0$  manifests as envelope modulations,  
69 we expect the simulations to approximate the neural response to the  $f_0$  in continuous speech as  
70 well. Therefore, we hypothesized that using the simulated population response as a feature would  
71 increase the performance of the linear models.

72 An additional benefit of using the model of the auditory periphery by Bruce et al. (2018) is  
73 that relative contributions of neural populations with different center frequencies (CF) could be  
74 investigated. The adult human  $f_0$  ranges from about 80 to 300 Hz, and intuitively one would  
75 expect the  $f_0$  response to be driven by ANF with a CF in this range. However, there is evidence  
76 (from classic envelope following response (EFR) paradigms) that the  $f_0$  response is not primarily  
77 driven by the stimulus  $f_0$  but mostly by its harmonics (Aiken and Picton, 2006; Laroche et al.,  
78 2013), whose combined response periodicity equals the  $f_0$ . For this reason, amongst others, ANF  
79 with larger CF are thought to contribute as well (Dau, 2003). Moreover, the higher harmonics of  
80 a stimulus can be divided in resolved and unresolved harmonics (Micheyl and Oxenham, 2004).  
81 Resolved harmonics are low frequency harmonics ( $< 1$  kHz) which are each processed in a separate  
82 auditory filter in the cochlea. In contrast, unresolved harmonics have higher frequencies and  
83 multiples of them will occur within a single auditory filter so the auditory system processes them  
84 in a combined fashion. Several studies have tried to distinguish the contributions of resolved and  
85 unresolved harmonics to the classic EFR (Krishnan and Plack, 2011; Laroche et al., 2011, 2013),  
86 with varying results. Recently, findings of Saiz-Alia and Reichenbach (2020) suggested that fibers  
87 with CFs up to 8 kHz (corresponding to both resolved and unresolved harmonics) contribute more  
88 or less equally to the continuous  $f_0$ -tracking response, but the stimulus used in that study has  
89 unnaturally strong higher harmonics (see discussion in Van Canneyt et al. (2020b)). We used the  
90 model simulations and canonical correlation analysis (CCA) to verify this finding for speech with  
91 a more natural speech profile.

92 With the model of the auditory periphery, EEG response characteristics up to primary auditory  
93 nerve are adequately captured. However, the  $f_0$  tracking response is predominantly generated  
94 beyond the ANFs. In our previous work, Van Canneyt et al. (2020b), we have shown that  
95 the primary sources for the  $f_0$  tracking response are located in the brainstem, with possible  
96 cortical contributions. Therefore, the second strategy focussed on auditory processing higher-  
97 up the auditory pathway. Auditory models of brainstem processing already exist (Nelson and  
98 Carney, 2004; Verhulst et al., 2018; Carney et al., 2015; Saiz-Alia and Reichenbach, 2020), but we  
99 chose to design a new model that is simple, yet highly effective for our purpose, by focussing on the  
100 spectrum of the response. It is known that the frequency limit for phase-locking decreases along  
101 the auditory pathway, causing cortical sources to contribute more strongly for stimuli with low  $f_0$ .

102 This ties together with the fact that  $f_0$  (or envelope) following responses decrease in strength with  
103 increasing stimulus  $f_0$  (e.g. Purcell et al., 2004; Gransier, 2018; Van Canneyt et al., 2020a,b). The  
104 exact relation between response amplitude and stimulus frequency varies widely across individuals,  
105 and there are many peaks and valleys (Tichko and Skoe, 2017), but we hypothesized that this  
106 frequency-amplitude relation could be approximated with a Butterworth low-pass filter. Therefore,  
107 our higher-level model is essentially a low-pass filter for which we optimized the filter parameters,  
108 i.e. order and frequency cut-off, in a data-driven way. We hypothesized that applying this filter  
109 to the feature would enhance the backward modelling correlations because the spectrum of the  
110 EEG and the to-be-predicted feature match more closely.

111 In summary, this study aimed to optimize the feature used in linear models to analyse neural  $f_0$ -  
112 tracking by incorporating prior knowledge of the  $f_0$  response. Two strategies were examined: 1)  
113 using simulations of the neural population response in the auditory periphery as the feature and 2)  
114 applying a low-pass filter to the feature to account for the effect of more central processing on the  
115 spectrum of the response. The two strategies were applied separately as well as combined, and the  
116 effect on backward modelling correlations was investigated. Additionally, the model simulations  
117 were used to quantify the relative contributions of ANF with different CF to the  $f_0$  response.

## 118 **2. Methods**

### 119 *2.1. Dataset*

120 The neural responses analysed in this study are part of an existing data set (Accou et al., 2020;  
121 Monesi et al., 2020) that was also used in our previous work (Van Canneyt et al., 2020b). EEG  
122 responses to continuous speech were measured for 34 young normal hearing participants, who  
123 were native Flemish (or Dutch) speakers (31 females, 3 males), with ages ranging between 18  
124 and 24 years old (mean = 22.4 years, standard deviation = 1.4 years). All participants were  
125 normal hearing (all thresholds < 20 dB HL), which was verified using pure-tone audiometry  
126 (octave frequencies between 125 and 8000 Hz). The continuous speech stimulus was a Flemish  
127 story, titled "Milan" (written and narrated by Stijn Vranken), which lasted 14.6 minutes and had  
128 a mean  $f_0$  of 107 Hz (interquartile range = 34.7 Hz). The experiments were approved by the  
129 medical ethics committee of the University Hospital of Leuven and all subjects signed an informed  
130 consent form before participating (s57102).

### 131 *2.2. EEG responses*

132 The EEG responses in the dataset were recorded with a 64-channel Biosemi ActiveTwo EEG  
133 recording system (fs = 8192 Hz). The 64 Ag/AgCl active scalp electrodes were placed on a  
134 cap according to the international standardized 10-10 system (American Clinical Neurophysiology



135 Society, 2006). Subjects were seated in an electromagnetically-shielded sound-proof booth and  
136 instructed to listen carefully to the story, which was presented binaurally through electrically-  
137 shielded insert phones (Etymotic ER-3A, Etymotic Research, Inc., IL, USA) using the APEX 3  
138 software platform (Francart et al., 2008). Stimulus intensity was set to 62 dB A in each ear.  
139 The setup was calibrated in a 2-cm<sup>3</sup> coupler (Brüel & Kjaer, type 4152, Nærum, Denmark) using  
140 stationary speech weighted noise with the same spectrum as the story. To encourage attentive  
141 listening, participants answered a question about the content of the story after its presentation.

142 We applied several preprocessing steps to the raw EEG data from the dataset. First, the data was  
143 downsampled to a sampling frequency of 1024 Hz. Then, artefacts were removed using a multi-  
144 channel Wiener filter algorithm with delays from -3 to 3 samples included and a noise weighting  
145 factor of 1 (Somers et al., 2018). The data was re-referenced to the average of all electrodes and  
146 band-pass filtered with a Chebyshev filter with 80 dB attenuation at 10 % outside the pass-band  
147 and a pass-band ripple of 1 dB. The filter cut-offs, i.e. 75 and 175 Hz, were chosen based on the  
148 f<sub>0</sub> distribution of the story. We also applied a notch filter to remove the artefact caused by the  
149 third harmonic of the utility frequency at 150 Hz (the other affected frequencies did not fall in  
150 the bandpass filter range). The EEG was normalized to be zero mean with unit variance.

### 151 *2.3. Linear decoding model*

152 The EEG responses were analysed with linear backward decoding models implemented in  
153 MATLAB R2016b (The MathWorks Inc., 2016) using custom scripts and the mTRF toolbox  
154 (Crosse et al., 2016). A description of the main methods is provided here, but for details we refer  
155 to Van Canneyt et al. (2020b). In backward linear modelling or decoding, one reconstructs a  
156 known stimulus-related feature based on a linear combination of the time-shifted data from the  
157 EEG electrodes. In this study, time shifts between 0-40 ms in steps of 1/fs (fs = 1024 Hz) were  
158 included. First, a section of the data (including minimum 2 minutes of voiced data) was set aside  
159 for testing and the model was estimated based on the remainder of the data. Regularization was  
160 done using ridge regression (Tikhonov and Arsenin, 1977; Hastie et al., 2001; Machens et al., 2004).  
161 Then, the estimated model was used to reconstruct the feature for the testing data. Finally, the  
162 bootstrapped Spearman correlation between the reconstructed feature and the actual f<sub>0</sub> feature,  
163 for the test section, was calculated (median over 100 index-shuffles). Importantly, unvoiced and  
164 silent sections were removed from the reconstructed and actual feature before correlating, because  
165 they have no reliable f<sub>0</sub> (Forte et al., 2017). To validate the backward decoding results, we used  
166 a 3-fold cross-validation approach. The final backward correlation, i.e. the median over the folds,  
167 was compared to a significance level (based on correlations with spectrally-matched noise signals)  
168 to evaluate its statistical significance (two-sided test,  $\alpha = 0.05$ ).

169 2.4. The features

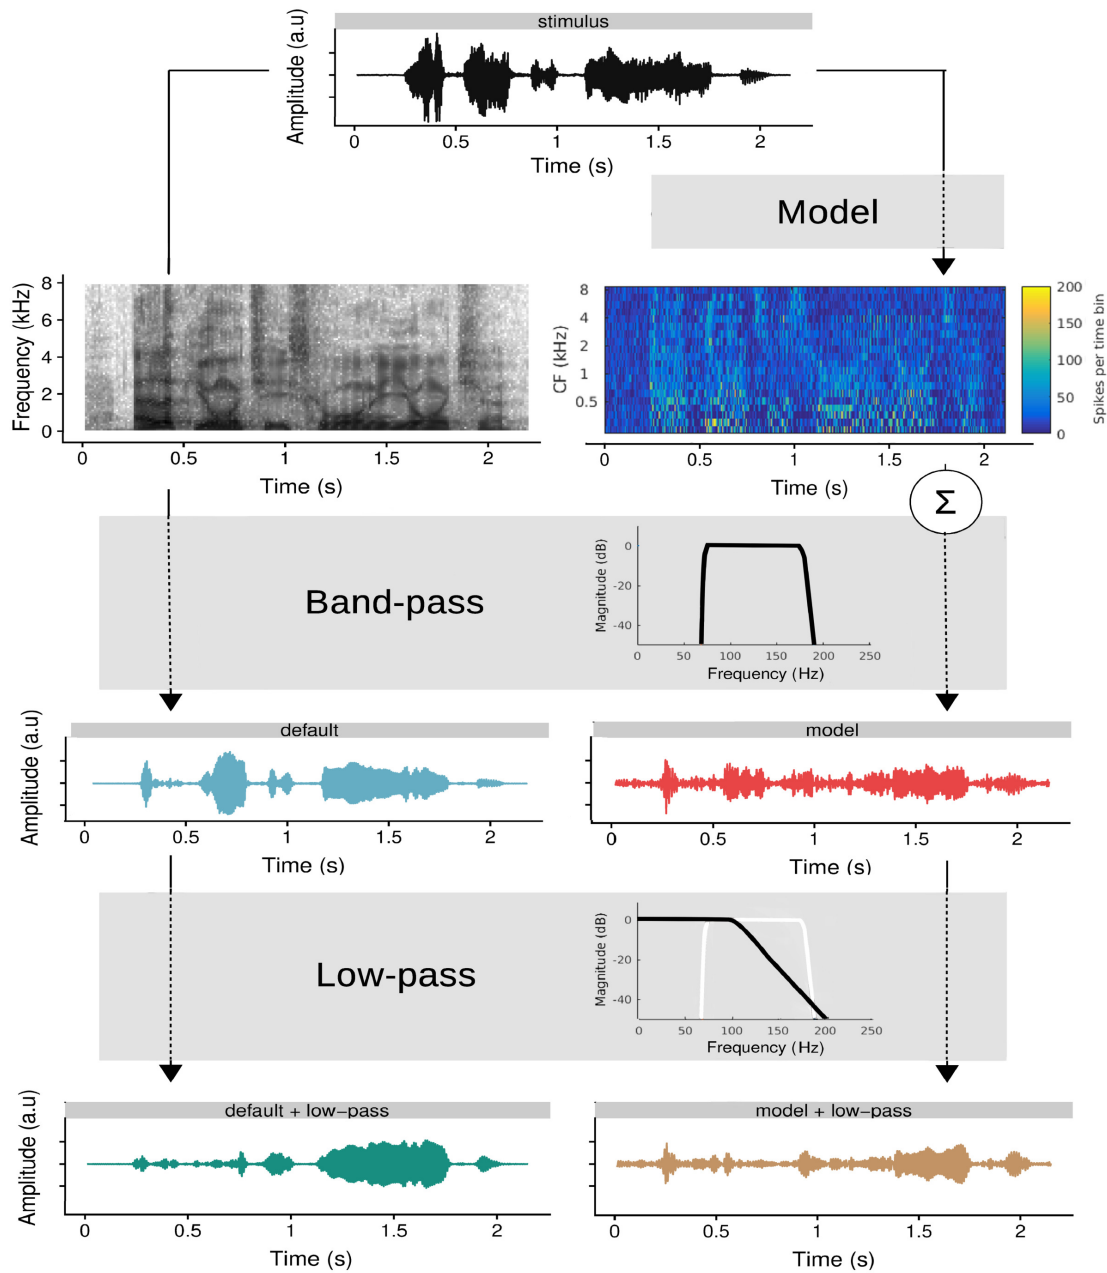

Figure 1: *Visualisation of the stimulus and how the features were derived from it.* The sentence shown is "Elk jongetje is gewoon een jongetje" (translation: "every boy is just a boy").

170 To investigate how the neural system tracks the  $f_0$ , the linear modelling approach requires a  $f_0$   
171 feature, i.e. a waveform reflecting the instantaneous  $f_0$  of the stimulus. In previous  $f_0$ -tracking  
172 work (Van Canneyt et al., 2020b; Etard et al., 2019),  $f_0$  features were obtained by bandpass filtering  
173 the stimulus ('default'). The aim of this study was to develop a more optimal method to create  
174 the feature. A first strategy we explored, was to use a model of the auditory periphery to obtain

175 the feature ('model'). A second strategy was to apply an additional low pass filter, that roughly  
176 simulates neural processing beyond the auditory periphery, either to the default feature (default  
177 + low-pass) or to the model feature ('model + low-pass'). The four features (the default feature,  
178 the model feature, the low-passed default feature and the low-passed model feature) are visualised  
179 in figure 1. Below the calculation of each of the features is discussed in detail. Importantly,  
180 unvoiced and silent sections were set to zero in all features before normalizing to zero mean and  
181 variance of 1. We performed linear decoding analysis of the data with each of the four features and  
182 compared the resulting correlations. Feature-induced differences between backward correlations  
183 were statistically evaluated in R (version 3.6.3., R Core Team (2018)), using linear mixed models  
184 (package lme4, version 1.1.21, Douglas et al. (2015)) with a random intercept per subject.

185 *2.4.1. The default feature* The "default" feature was based on band-pass filtering of the stimulus.  
186 Specifically, we used a Chebyshev bandpass filter with 80 dB attenuation at 10 % outside the pass-  
187 band and a pass-band ripple of 1 dB. The filter cut-offs, i.e. 75 and 175 Hz, were chosen based  
188 on the f0 distribution of the story. This filter is identical to the one applied to the EEG (see  
189 above). The amplitude response of the band-pass filter, as well as the resulting default feature, is  
190 visualized in Figure 1.

191 *2.4.2. The model-based feature* The model-based feature is generated with a phenomenological  
192 model of the auditory periphery (Carney, 1993; Zhang et al., 2001; Bruce et al., 2003; Zilany  
193 and Bruce, 2006, 2007; Zilany et al., 2009, 2014; Bruce et al., 2018). The model simulates spike  
194 patterns from a population of auditory nerve fibers in response to an input stimulus. Here, the  
195 model simulated 20 different center frequencies (CFs) logarithmically spaced between 250 and  
196 8000 Hz and for every CF, there were 50 nerve fibers with different spontaneous firing rates: 10  
197 low (0.1 spikes/s), 10 mid (4 spikes/s) and 30 high (70 spikes/s). For a detailed description of the  
198 model as well as the model code, we refer to Bruce et al. (2018). However, two important changes  
199 were made to the model to increase the temporal resolution of the output: the window length of  
200 the smoothing Hamming window in the post-stimulus time-histogram (PSTH) was decreased from  
201 128 to 32 samples and the amount of bins over which the PSTH was integrated was decreased  
202 from 10 to 5. The process to obtain the model-based f0 feature is visually represented in figure  
203 1: the model received the Flemish story as input and produced simulated spike patterns for ANF  
204 at each of the CF, which can be visualised in a neurogram. The spike patterns were summed  
205 across all CFs (i.e. summing along the y-axis of the neurogram) to obtain the neural response at  
206 population level. Finally, the same band-pass filter as discussed in section 2.4.1 was applied to  
207 extract the neural response to the f0.

208 *2.4.3. The low-pass filtered features* We applied a low-pass filter to the feature such that the  
209 spectrum of the feature better resembled the spectrum of the expected f0 response, i.e. with  
210 reduced amplitude for higher frequencies. To avoid unwanted side effects of the filtering, especially  
211 in the stopband, we used a Butterworth filter. The order and cut-off frequency were determined  
212 in a data-driven way: for each subject, we calculated linear decoding models based on the default  
213 feature, low-pass filtered with different filter orders (1, 2, 4, 6, 8, 10, 12) and filter cut-offs (75,  
214 80, 90, 100, 110, 120, 130, 140, 155, 175 Hz). Including a wider range of cut-offs made little sense  
215 because the features are already filtered by a bandpass filter that strongly attenuated frequencies  
216 outside this range (see earlier). The results of this optimisation are discussed in detail in section  
217 3.2. In summary, we found a 8th (or higher) order filter with a cut-off frequency of 110 Hz to  
218 be optimal. The amplitude response of this filter is shown in figure 1. The same optimization  
219 process was performed for the model-based feature leading to nearly identical results, which were  
220 therefore not reported. As shown in figure 1, the optimized low-pass filter was applied to both  
221 the default and the model-based feature to create the two low-passed features.

222 *2.5. The relative contribution of nerves with different center frequencies*

223 The model simulations produced neural firing patterns for a group of 50 ANF at 20 CF, which  
224 were all summed together to obtain the model-based feature. In an additional analysis, we  
225 investigated the response at different CFs separately using a canonical correlation analysis (CCA).  
226 In preparation for the CCA, the spike patterns at each of the CF were filtered with the same  
227 bandpass filter specified earlier in section 2.4.1 and normalized to be zero mean. Moreover, the  
228 silent and unvoiced section were removed. Whereas linear backward decoding models are trained  
229 by finding the weighted combination of EEG channels that maximally correlates with a fixed  
230 feature, canonical correlation analysis (CCA) optimizes the correlation by applying weights to  
231 both the EEG channels and a set of features. In this case, the CCA assigned weights to the  
232 simulated response at each of the CFs, which is indicative of the relative importance of nerves  
233 with that CF for the f0 response. The CCA also determined weights for the EEG channels  
234 and their time-shifted versions (0-40 ms with 1/fs steps ( $fs = 1024$  Hz)), but interpreting these  
235 'backward' weights as a spatial distribution of the response is not reliable. As argued by Haufe  
236 et al. (2014a), large weights may be paired with channels unrelated to the signal of interest while  
237 channels containing response energy may receive small weights. These misleading effects occur  
238 because the linear model attempts to suppress noise components. To resolve this issue, Haufe  
239 et al. (2014a) proposed to transform backward models into forward models. In forward modelling,  
240 the EEG data in each recording channel is predicted based on the feature and its time-shifted  
241 versions. This method is less powerful than backward modelling, but since each EEG channel is  
242 treated separately, noise suppression cannot take place so the forward modelling weights can be  
243 reliably interpreted.

244 CCA estimated as many canonical components (sets of weights) as there are elements in the  
245 smallest set, which in this case was determined by the amount of CFs included in the model,  
246 i.e. 20. Each of these components was estimated under the constraint that they are uncorrelated  
247 with the previous components. The 20 resulting models, or CCA components, were applied to 2  
248 minutes of unseen voiced data and bootstrapped Spearman correlations between the reconstructed  
249 features and the actual f0 features were calculated (median over 100 index-shuffles). To assess the  
250 significance of each of the components, significance thresholds were estimated in the same way as  
251 for the linear decoding models.

252 To understand the spatio-temporal characteristics of the canonical components, the significant  
253 components were transformed to a forward model, following Haufe et al. (2014a). This was done  
254 by weighing the model simulated responses at different CFs according to the weights estimated  
255 by CCA (instead of equal weighting in the default case) and summing it together to obtain a  
256 new f0 feature. This new feature and its time-shifted versions (-20 to 80 ms with 1/fs steps (fs  
257 = 1024 Hz)) were then used to predict the EEG response in each channel. The weights of the  
258 forward model can be interpreted through temporal response functions (an average over channels  
259 in function of time), which reflect the impulse response of the auditory system, and also through  
260 topoplots, which reveal the spatial distribution of the response at specific time lag. Because of the  
261 large degree of autocorrelation present in the f0 feature, response energy is spread in time, both  
262 in the TRFs and the topoplots. To help with interpretation, we calculated Hilbert TRFs, but the  
263 underlying autocorrelative smearing should be kept in mind. For more details on Hilbert TRFs  
264 and other aspects of the forward modelling, we refer to our previous work: Van Canneyt et al.  
265 (2020b).

266 **3. Results**

267 *3.1. Comparison of backward decoding results*

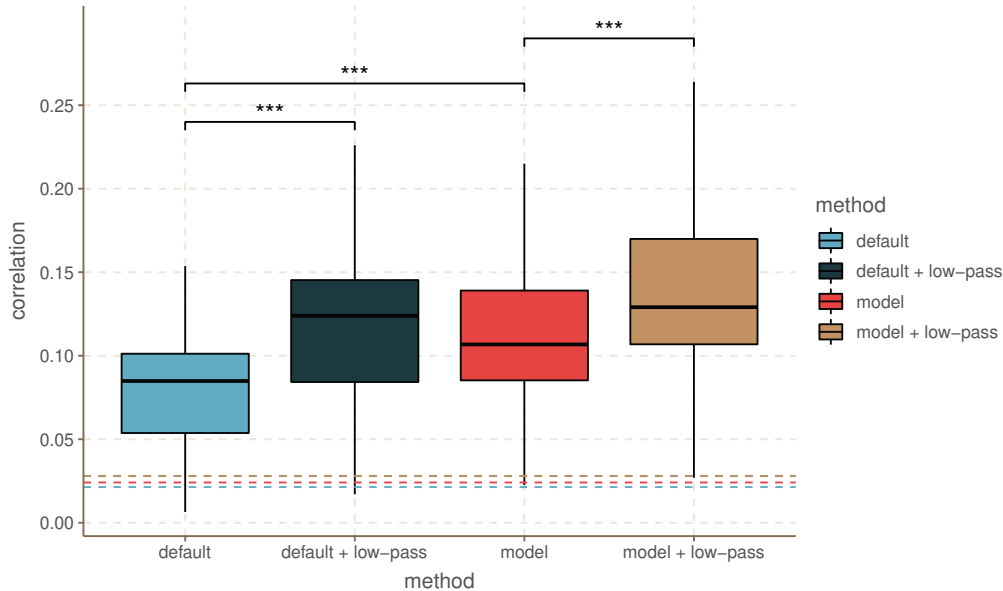

Figure 2: Comparison of correlations for all subjects obtained with each of the features. The dashed lines indicate the significance level. \*\*\* indicates a significant difference with a  $p < 0.001$ .

268 We performed linear decoding analysis of the same neural data with four different features: the  
269 default feature, the model-based feature, the low-passed default feature and the low-passed model-  
270 based feature. Figure 2 compares the backward correlations obtained for all subjects with each  
271 of the features. Visual comparison indicates that analysis with the model based-feature produced  
272 larger correlations compared to analysis with the default feature. Moreover, adding the low-  
273 pass filter improved correlations both for the default and the model-based feature. Significance  
274 levels are highly similar across features (dashed lines). The only feature that provided significant  
275 correlations for all subjects is the low-passed model-based feature. A linear mixed model with  
276 random intercept per subject was used to statistically evaluate the relative performance of the  
277 features. There was a significant difference between the correlations obtained with the default  
278 and the model-based feature ( $\beta = 0.030$ ,  $df = 102$ ,  $t = 10.7$ ,  $p < 0.001$ ). Moreover, there was a  
279 significant difference between the correlations obtained with the default and low-passed feature  
280 ( $\beta = 0.036$ ,  $df = 102$ ,  $t = 12.8$ ,  $p < 0.001$ ). Finally, the combination of the low-pass filter and the  
281 model-based feature resulted in significantly different correlations compared to the model-based  
282 feature on its own ( $\beta = 0.022$ ,  $df = 102$ ,  $t = 8.0$ ,  $p < 0.001$ ).

283 3.2. Optimisation of the low-pass filter

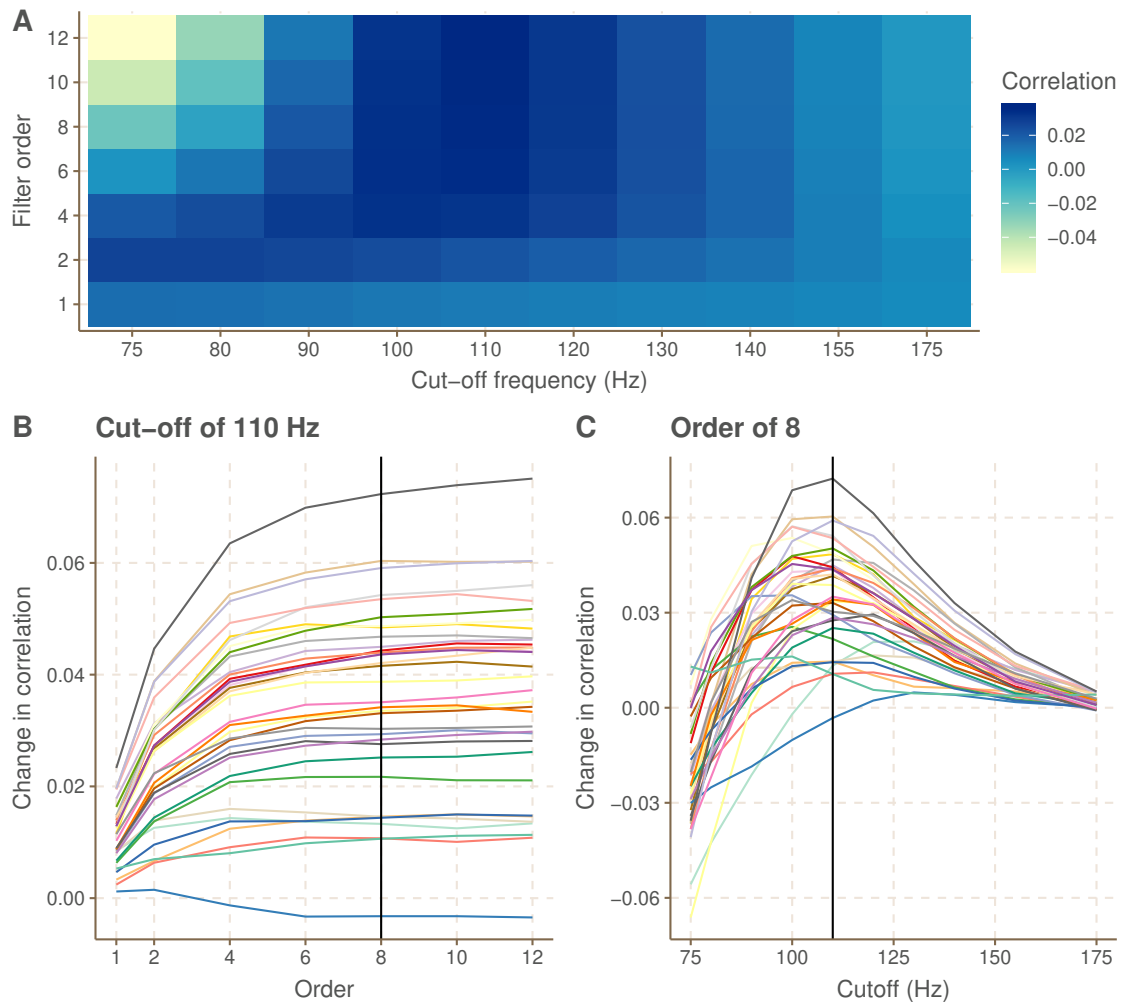

Figure 3: Results of the optimisation of the low-pass filter applied to the default feature A. Change in backward correlation caused by applying a low-pass filter with the specified order and cut-off frequency to the default feature, averaged over subjects. B. Change in backward correlation by altering the filter order with the cut-off frequency fixed at 110 Hz, for each subject separately. C. Change in backward correlation by altering the filter cut-off frequency with the filter order fixed at 8, for each subject separately.

284 As described in the methods, the parameters of the Butterworth filter, used to filter the features,  
285 were defined in a data driven way. In figure 3, the results of this optimization are presented. We  
286 identified the filter parameters that induced the largest increase in correlation, compared to the  
287 correlation obtained with the default non-filtered feature. The results indicated that the largest  
288 increase in correlations, on average over subjects, occurred for a filter of 8th (or higher) order with  
289 a cut-off frequency of 110 Hz (panel A). For the majority of the subjects, increasing the order of the  
290 filter up to 8, while keeping the cut-off frequency fixed at 110 Hz, resulted in a monotonic increase



291 of the correlation. Using filter orders larger than 8 did not further enhance the correlations (Panel  
292 B). With a fixed filter order of 8, a cut-off frequency of 110 Hz was most optimal for the majority  
293 of the subjects ( $n = 19$ ), but for some subjects a cut-off of 100 Hz ( $n = 9$ ), 120 ( $n = 5$ ) or 130 Hz  
294 ( $n = 1$ ) was better (Panel C). For filter cut-off frequencies near 175 Hz, the change in correlation  
295 induced by low-pass filtering approached 0, because in those cases the attenuation of the low-pass  
296 filter fell outside the bandpass-filter (applied earlier), and therefore had no effect. In contrast,  
297 filter cut-offs below 80 Hz tended to decrease the correlation, indicating the importance of the  
298 lower frequencies. Optimisation of the low-pass filter on the model-based feature led to highly  
299 similar results and was therefore not shown.

### 300 *3.3. The relative contribution of nerves with different center frequencies*

301 To estimate the relative contribution of auditory nerve fibers with different CF to the  $f_0$  response,  
302 we performed CCA with the simulated spike patterns per CF. Out of the 20 estimated CCA  
303 components, the first two provided correlations that were larger than the significance level for  
304 the majority of the subjects (Figure 4, panel A). The median correlation over subjects obtained  
305 for the first component (0.099) is similar to what was found with the model-based feature in  
306 regular linear decoding (0.106), while the median backward correlation of the second component  
307 is smaller (0.076). The variance over subjects is also similar to what was observed for regular  
308 linear modelling. Panel B and C of figure 4 indicate the weight pattern for the first and second  
309 component, respectively. Note that the sign of these weights can be reversed without a change  
310 in meaning, as long as it is done for all the weights. The estimated weight patterns are highly  
311 similar across subjects. The first component revealed positive weights to all CFs except the lowest  
312 one, i.e. 250 Hz, which had a large negative weight. The second component is divided between  
313 positive weights for CFs below 1 kHz and smaller, (mostly) negative weights above 1 kHz. Weight  
314 patterns for non-significant CCA components were not analysed.

315 Through forward modelling using features assembled from the neurogram according to the  
316 weightings displayed in panel B of Figure 4, the spatio-temporal characteristics of the canonical  
317 components was analysed. Panel C of Figure 4 presents the Hilbert TRFs for the two significant  
318 canonical components. The TRF for the first component peaks around 12.3 and 18.4 ms and is  
319 highly similar to the TRF of the regular model feature (black dotted line). This is not surprising  
320 as the CCA weights approximate equal weighting across CFs. However, the second component  
321 has a more narrow and earlier peak at 9.22 ms. The topoplots in panel D of Figure 4 indicate  
322 the spatial distribution of the response energy at these peak lags and these are highly similar  
323 to what was reported in Van Canneyt et al. (2020b). The second component seems to have less  
324 temporo-mastoidal activity which, together with the narrower and earlier TRF, indicates less  
325 cortical contributions compared to component 1.

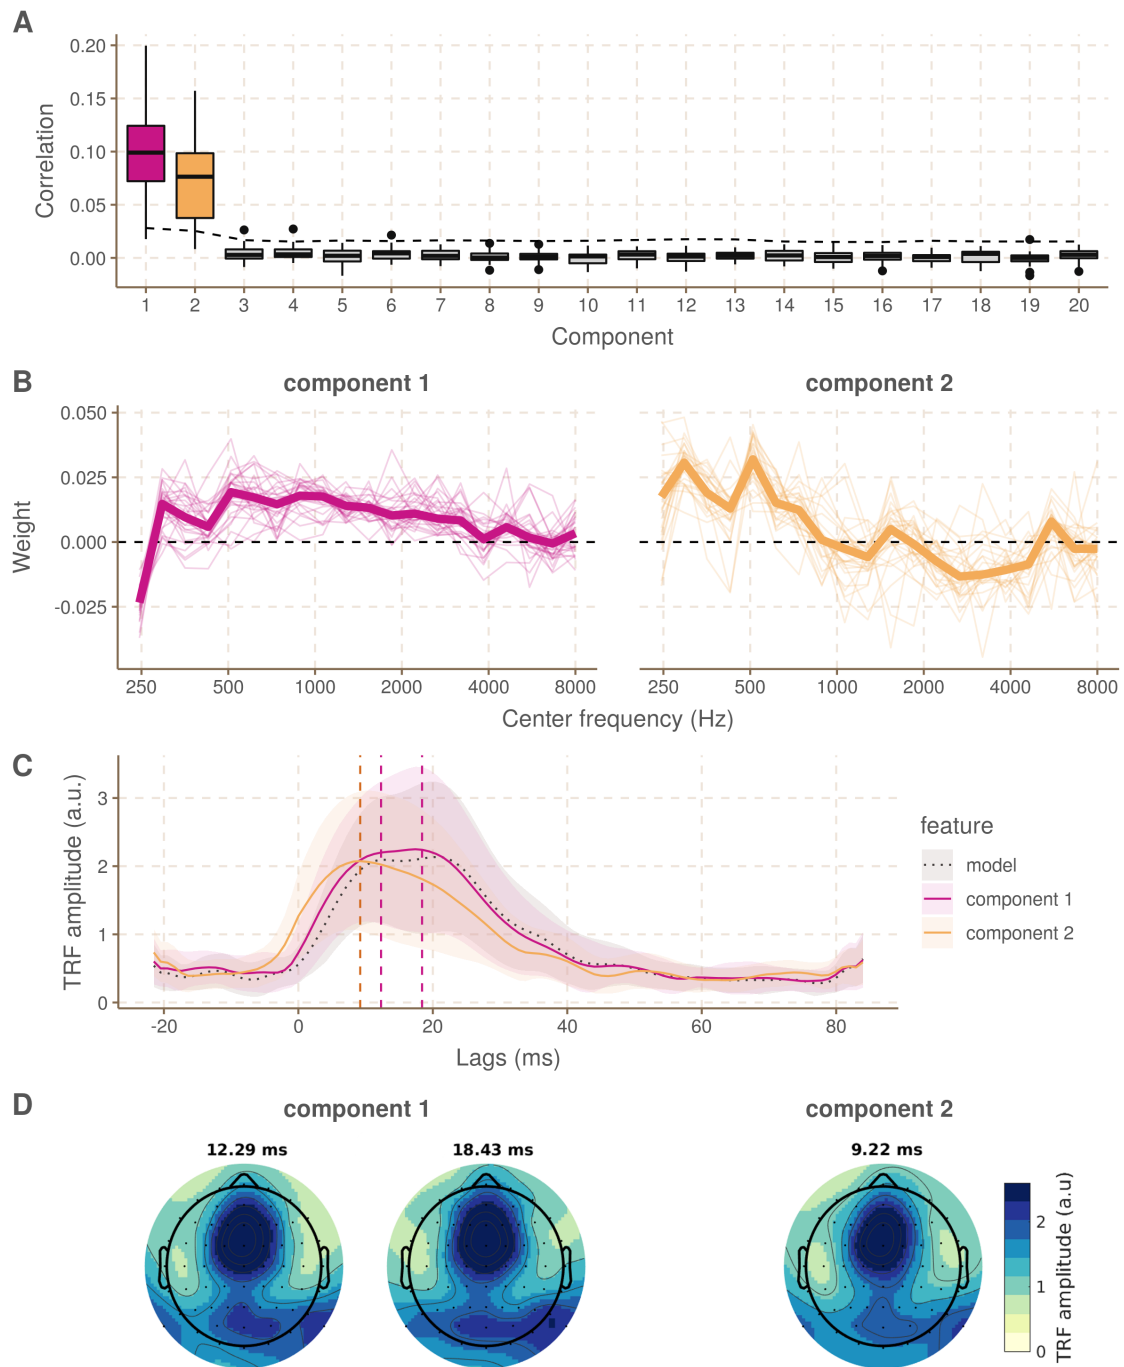

Figure 4: Results of the CCA using the spike patterns per CF and the EEG (+ time shifted versions) A. Backward correlations for each of the subjects and for each of the 20 canonical components. The significance level is indicated with a dashed line. B. CCA weights across CFs for the first and second component respectively, for each of the subjects (thin line) and in the median case (thick line). C. Hilbert TRFs for the two significant canonical components and the regular model (black dotted line). The peaks lags at which topoplots were plotted in panel D are indicated with vertical dashed lines. D. Topoplots at the peaks lags of the TRFs in panel C.

326 **4. Discussion**

327 The goal of this study was to enhance the analysis of f0-tracking responses to continuous speech by  
328 optimizing the feature used in the linear decoding models. Backward correlations for f0-tracking  
329 responses reported in earlier studies are typically quite small, i.e. in the range of 0.03 - 0.08.  
330 Larger correlations would facilitate the detection and interpretation of group differences (less floor  
331 effects) and make f0-tracking analysis more robust. We hypothesized that better results would be  
332 obtained when the feature better resembled the expected neural response, as predicting the one  
333 from the other would be easier.

334 A first strategy to optimize the feature was to use a model of the auditory periphery to simulate  
335 the neural response to the stimulus at the level of the primary auditory nerve. In a prior study, Van  
336 Canneyt et al. (2019), we showed how simulated population responses constructed through this  
337 model reliably predict neural responses to envelope modulations. Here, the simulated population  
338 responses were used as a feature in the linear decoding models. The model-based feature improved  
339 the mean correlation over subjects from 0.079 to 0.109, compared to the default feature. The model  
340 simulated auditory processing up to the primary auditory nerve, but f0-tracking is generated in  
341 the brain stem, with possible cortical contributions (Van Canneyt et al., 2020b). To account for  
342 the higher processing stages, we focussed on simulating the limitations of phase-locking. Phase-  
343 locking is less reliable for higher frequencies and the higher up the auditory pathway, the lower the  
344 maximum frequency that can be phase-locked to. This leads to a decreasing amplitude-frequency  
345 relation for the neural response, which we simulated through low-pass filtering. As shown in figure  
346 2, low-pass filtering the default feature improved the mean correlation over subjects from 0.079 to  
347 0.115. Since the two strategies target processes from different sections of the auditory pathway,  
348 it made sense to evaluate their combined effect. The combination of both strategies delivered  
349 the best results with significant correlations for all subject and almost a doubling of the mean  
350 correlation across subjects, from 0.079 to 0.130.

351 Importantly, the newly developed features differ in the time and computational resources necessary  
352 to obtain them. Depending on the duration of the continuous speech stimulus, calculating the  
353 simulated neural responses with the phenomenological model is computationally very expensive.  
354 In experimental settings where the same stimulus is presented to many subjects, use of the model  
355 is feasible as the model simulation can be reused for all subjects. However, the process to obtain  
356 the model-based feature is likely too slow for real-time applications. In contrast with the model-  
357 based feature, the addition of a low-pass filter is a quick and simple operation, which is easy  
358 to implement and likely possible in real-time. Moreover, even though this approach is relatively  
359 rudimentary, our results indicate it still provides a substantial benefit. Alternatively, one could  
360 account for auditory processing beyond the auditory nerve, by using a model of the auditory  
361 pathway up to the brainstem, as proposed by Verhulst et al. (2018) or Saiz-Alia and Reichenbach

362 (2020). This way, neural responses at the level of the brainstem are simulated. However, these  
363 models are even more computationally expensive than the model of the auditory periphery.

364 The parameters of the filter used for the low-passed features were determined in a data-driven way.  
365 On a group-level, the backward correlations improved the most when the feature was filtered with  
366 a 8th (or higher) order Butterworth filter with a cut-off at 110 Hz. The order of the filter could be  
367 further increased without impacting the correlations but the optimal cut-off frequency was rather  
368 specific: varying it more than 10 Hz up or down reduced the correlations. It is also possible to  
369 use the optimal filter parameters for each subject individually, however this barely improved the  
370 correlations on a group-level (from 0.1145 to 0.1172 for the low-passed default feature and from  
371 0.1309 to 0.1313 for the low-passed model-based feature). The optimization process was time-  
372 intensive and useful to develop the new feature, but does not necessarily need to be repeated for  
373 new data/stimuli. From explorations on different datasets with different evoking stimuli, we have  
374 learned that the optimal filter order is usually situated between 4 and 8, with voices with higher  $f_0$   
375 favouring lower order filters. The optimal filter cut-off usually falls a little (e.g. 40-50 Hz) above  
376 the lower cut-off chosen for the bandpass filter, which is determined based on the  $f_0$  distribution  
377 of the story. Essentially, the filter should be designed such that the frequencies in the lower range  
378 of the  $f_0$  distribution of the stimulus are left untouched and higher frequencies are gradually more  
379 attenuated.

380 This study also included an investigation of the relative contributions of ANF with different CFs  
381 to the neural  $f_0$  tracking response. In this analysis, the simulated responses at different CF were  
382 assigned weights to optimize the correlation with a linear combination of the multi-channel and  
383 time-lagged EEG. The first CCA component indicated mainly positive weights, which confirms  
384 the findings by Saiz-Alia and Reichenbach (2020) that the  $f_0$ -tracking response is generated by a  
385 collective of neurons with CFs up to 8kHz. The backward correlations obtained for this first CCA  
386 component were highly similar to the correlations obtained for the regular model-based feature,  
387 which makes sense since the weight pattern strongly resembles the uniform weighting used in  
388 the regular model-based feature. The CCA weights do indicate a steady decrease in relative  
389 contribution towards larger CF, which contrast the finding of Saiz-Alia and Reichenbach (2020)  
390 where CF up to 8 kHz were considered to contribute equally. Potentially, this difference is related  
391 to the fact that the stimulus of Saiz-Alia and Reichenbach (2020) has stronger higher harmonics  
392 than the stimulus of the present study. The observation that nerves with higher CF contribute to  
393 the neural  $f_0$  tracking response, not just the ANF with CF near the  $f_0$ , follows the results of Dau  
394 (2003). Moreover, it also is in line with previous findings that claim that the EFR/ $f_0$ -response is  
395 driven by both resolved and unresolved harmonics of the stimulus, not just the  $f_0$  (Jeng et al., 2011;  
396 Laroche et al., 2011, 2013; Van Canneyt et al., 2020a). Finally, the fact that higher harmonics  
397 are important drivers of the response could partly explain why the model feature outperforms the  
398 default feature: the model takes the full stimulus spectrum as input and can process the relative

399 strengths of the higher harmonics and estimate their contribution to the f0 response, whereas the  
400 default feature only takes the energy around the f0 into account.

401 Remarkably, the CCA brought up a second component with (smaller) significant correlations,  
402 which is per definition uncorrelated to the first. CCA components differ in the weights assigned  
403 to the CF, but also have different temporal-spatial patterns, i.e. the weighting of different  
404 EEG channels at different time-shifts. Therefore, a second significant component could indicate  
405 an additional neural process underlying the f0-tracking response, possibly with different neural  
406 generators. The weights for the second component are large and positive for ANF with lower  
407 CF (<1000 Hz) and smaller and mostly negative for higher CF. This pattern could indicate that  
408 the process behind the second component focusses on the resolved harmonics in the stimulus and  
409 disregards the unresolved harmonics which typically occur above 1000 Hz. To learn more about  
410 the neural origin of this second response component, and how it differs from the first component,  
411 we applied Haufe et al. (2014b)'s suggestion to turn a backward model into a forward model.  
412 The results for the first component are highly similar to what was found for the regular model  
413 feature and to what was reported in our previous work (Van Canneyt et al., 2020b): TRFs with  
414 two peaks at lags around 13 and 18 ms and a topoplot with central and right temporo-mastoidal  
415 activity, suggestive of generators in the brainstem and right auditory cortex. The second process  
416 has a similar predominantly central spatial pattern but reduced temporo-mastoidal activity as  
417 well as only one and earlier TRF peak around 9 ms. This suggests that this second process occurs  
418 predominantly in the brainstem, without cortical contributions. These findings seem in line with  
419 the theory put forward by Laroche et al. (2011, 2013) that resolved and unresolved harmonics are  
420 processed in different but interacting pathways that converge in the upper brainstem.

## 421 **5. Conclusion**

422 In summary, this study has enhanced neural f0-tracking by optimizing the f0 feature such that  
423 it better resembles the expected neural response. Our recommendations are as follows: when  
424 fast and flexible implementation is required, low-pass filtering the feature is a great tool to boost  
425 correlations. When the stimulus is fixed and heavy computations are possible, the model-based  
426 feature, combined with a low-pass filter is preferred. Finally, if one wants to increase precision at  
427 the cost of even more computational power, one should consider a more extensive model of the  
428 auditory system that includes the brainstem (and ideally the primary auditory cortex as well).  
429 Besides, model simulations combined with CCA indicated that f0-tracking might be generated by  
430 two uncorrelated processes of which the first dominant one is driven by ANF with a broad range of  
431 CFs (up to 8 kHz) and the second smaller one is driven mostly by ANF responding to unresolved  
432 harmonics (CFs below 1 kHz). Cortical contributions are larger for the first process compared to  
433 the second.

## REFERENCES

17

### 434 Acknowledgments

435 Authors would like to thank Bernd Accou and Wendy Verheijen for collecting the dataset used  
436 in this study. They were assisted in data collection by Amelie Algoet, Jolien Smeulders, Lore  
437 Kerkhofs, Sara Peeters, Merel Dillen, Ilham Gamgami en Amber Verhoeven. We also would like  
438 to thank Simon Geirnaert for his advice, especially with regards to CCA. This research was funded  
439 by TBM-project LUISTER (T002216N) from the Research Foundation Flanders (FWO) and also  
440 jointly by Cochlear Ltd. and Flanders Innovation & Entrepreneurship (formerly IWT), project  
441 50432. Additionally, this project has received funding from the European Research Council under  
442 the European Unions Horizon 2020 research and innovation programme (grant agreement No.  
443 637424, ERC starting grant to Tom Francart). The first author, Jana Van Canneyt, is supported  
444 by a PhD grant for Strategic Basic research by the Research Foundation Flanders (FWO), project  
445 number 1S83618N. Finally, the research is carried out with support from a Wellcome Trust  
446 Collaborative Award in Science RG91976 to Dr. Bob Carlyon and Jan Wouters, and with support  
447 from Flanders Innovation & Entrepreneurship through the VLAIO research grant HBC.2019.2373  
448 with Cochlear. There are no conflicts of interest, financial, or otherwise.

### 449 References

- 450 Accou, B., Monesi, M. J., Montoya, J., Van Hamme, H., and Francart, T. (2020). Modeling the  
451 relationship between acoustic stimulus and EEG with a dilated convolutional neural network. In  
452 *28th European Signal Processing Conference (EUSIPCO)*, Amsterdam, Netherlands (in press).
- 453 Aiken, S. J. and Picton, T. W. (2006). Envelope following responses to natural vowels. *Audiology*  
454 *and Neurotology*, 11(04):213–232.
- 455 American Clinical Neurophysiology Society (2006). Guideline 5: guidelines for standard electrode  
456 position nomenclature. *Am. J. Electroneurodiagnostic Technol.*, 46:222–225.
- 457 Bruce, I. C., Erfani, Y., and Zilany, M. S. (2018). A phenomenological model of the synapse  
458 between the inner hair cell and auditory nerve: Implications of limited neurotransmitter release  
459 sites. *Hearing Research*, 360:40–54.
- 460 Bruce, I. C., Sachs, M. B., and Young, E. D. (2003). An auditory-periphery model of the effects of  
461 acoustic trauma on auditory nerve responses. *The Journal of the Acoustical Society of America*,  
462 113(1):369–388.
- 463 Carney, L. H. (1993). A model for the responses of low-frequency auditory-nerve fibers in cat.  
464 *The Journal of the Acoustical Society of America*, 93(1):401–417.
- 465 Carney, L. H., Li, T., and McDonough, J. M. (2015). Speech coding in the brain: Representation  
466 of vowel formants by midbrain neurons tuned to sound fluctuations. *eNeuro*, 2(4).

REFERENCES

18

- 467 Crosse, M. J., Di Liberto, G. M., Bednar, A., and Lalor, E. C. (2016). The multivariate  
468 temporal response function (mTRF) toolbox: A MATLAB toolbox for relating neural signals  
469 to continuous stimuli. *Frontiers in Human Neuroscience*, 10(NOV2016).
- 470 Dau, T. (2003). The importance of cochlear processing for the formation of auditory brainstem and  
471 frequency following responses. *The Journal of the Acoustical Society of America*, 113(2):936–  
472 950.
- 473 Ding, N. and Simon, J. Z. (2012). Neural coding of continuous speech in auditory cortex during  
474 monaural and dichotic listening. *Journal of Neurophysiology*, 107(1):78–89.
- 475 Douglas, B., Maechler, M., Bolker, B., and Walker, S. (2015). Fitting Linear Mixed-Effects Models  
476 Using lme4,. *Journal of Statistical Software*, 67(1):1–48.
- 477 Etard, O., Kegler, M., Braiman, C., Forte, A. E., and Reichenbach, T. (2019). Decoding of selective  
478 attention to continuous speech from the human auditory brainstem response. *NeuroImage*,  
479 200(May):1–11.
- 480 Forte, A. E., Etard, O., and Reichenbach, T. (2017). The human auditory brainstem response to  
481 running speech reveals a subcortical mechanism for selective attention. *eLife*, 6:1–13.
- 482 Francart, T., van Wieringen, A., and Wouters, J. (2008). APEX 3: a multi-purpose test platform  
483 for auditory psychophysical experiments. *Journal of Neuroscience Methods*, 172(2):283–293.
- 484 Gransier, R. (2018). *Phase-locked neural activity as a biomarker for auditory functioning: from*  
485 *speech perception to cochlear implant fitting*. PhD thesis, KU Leuven.
- 486 Hamilton, L. S. and Huth, A. G. (2020). The revolution will not be controlled: natural stimuli in  
487 speech neuroscience. *Language, Cognition and Neuroscience*, 35(5):573–582.
- 488 Hastie, T., Tibshirani, R., and Friedman, J. (2001). *The Elements of Statistical Learning*. Springer,  
489 New York.
- 490 Haufe, S., Meinecke, F., Görgen, K., Dähne, S., Haynes, J. D., Blankertz, B., and Bießmann, F.  
491 (2014a). On the interpretation of weight vectors of linear models in multivariate neuroimaging.  
492 *NeuroImage*, 87:96–110.
- 493 Haufe, S., Meinecke, F., Görgen, K., Dähne, S., Haynes, J.-D., Blankertz, B., and Bießmann, F.  
494 (2014b). On the interpretation of weight vectors of linear models in multivariate neuroimaging.  
495 *NeuroImage*, 87:96–110.
- 496 Jeng, F. C., Costilow, C. E., Stangherlin, D. P., and Lin, C. D. (2011). Relative power of harmonics  
497 in human frequency following responses associated with voice pitch in American and Chinese  
498 adults. *Perceptual and Motor Skills*, 113(1):67–86.
- 499 Krishnan, A. and Plack, C. J. (2011). Neural encoding in the human brainstem relevant to the  
500 pitch of complex tones. *Hearing Research*, 275(1-2):110–119.
- 501 Lalor, E. C. and Foxe, J. J. (2010). Neural responses to uninterrupted natural speech can be  
502 extracted with precise temporal resolution. *European Journal of Neuroscience*, 31(1):189–193.



REFERENCES

19

- 503 Laroche, M., Dajani, H., and Marcoux, A. (2011). Contribution of resolved and unresolved  
504 harmonic regions to brainstem speech-evoked responses in quiet and in background noise.  
505 *Audiology Research*, 1(1S).
- 506 Laroche, M., Dajani, H. R., Prévost, F., and Marcoux, A. M. (2013). Brainstem auditory responses  
507 to resolved and unresolved harmonics of a synthetic vowel in quiet and noise. *Ear and Hearing*,  
508 34(1):63–74.
- 509 Machens, C. K., Wehr, M. S., and Zador, A. M. (2004). Linearity of Cortical Receptive Fields  
510 Measured with Natural Sounds. *Journal of Neuroscience*, 24(5):1089–1100.
- 511 Mesgarani, N., David, S. V., Fritz, J. B., and Shamma, S. A. (2009). Influence of context and  
512 behavior on stimulus reconstruction from neural activity in primary auditory cortex. *Journal*  
513 *of Neurophysiology*, 102(6):3329–3339.
- 514 Micheyl, C. and Oxenham, A. J. (2004). Sequential F0 comparisons between resolved and  
515 unresolved harmonics: No evidence for translation noise between two pitch mechanisms. *The*  
516 *Journal of the Acoustical Society of America*, 116(5):3038–3050.
- 517 Monesi, M. J., Accou, B., Montoya-Martinez, J., Francart, T., and Van hamme, H. (2020). An  
518 LSTM based architecture to relate speech stimulus to EEG. In *ICASSP, IEEE International*  
519 *Conference on Acoustics, Speech and Signal Processing - Proceedings*. IEEE.
- 520 Nelson, P. C. and Carney, L. H. (2004). A phenomenological model of peripheral and central neural  
521 responses to amplitude-modulated tones. *The Journal of the Acoustical Society of America*,  
522 116(4):2173–2186.
- 523 Purcell, D. W., John, S. M., Schneider, B. A., and Picton, T. W. (2004). Human temporal  
524 auditory acuity as assessed by envelope following responses. *The Journal of the Acoustical*  
525 *Society of America*, 116(6):3581–3593.
- 526 R Core Team (2018). *R: A Language and Environment for Statistical Computing*. R Foundation  
527 for Statistical Computing, Vienna, Austria.
- 528 Saiz-Alia, M. and Reichenbach, T. (2020). Computational modeling of the auditory brainstem  
529 response to continuous speech. *Journal of Neural Engineering*, in press:0–31.
- 530 Somers, B., Francart, T., and Bertrand, A. (2018). A generic EEG artifact removal algorithm  
531 based on the multi-channel Wiener filter. *Journal of Neural Engineering*, 15(3).
- 532 The MathWorks Inc. (2016). *MATLAB: R2016b*. Natick, Massachusetts.
- 533 Tichko, P. and Skoe, E. (2017). Frequency-dependent fine structure in the frequency-following  
534 response: The byproduct of multiple generators. *Hearing Research*, 348:1–15.
- 535 Tikhonov, A. N. and Arsenin, V. Y. (1977). *Solutions of ill-posed problems*. Scripta series in  
536 mathematics. V. H. Winston & Sons, Washington.
- 537 Van Canneyt, J., Hofmann, M., Wouters, J., and Francart, T. (2019). The effect of stimulus  
538 envelope shape on the auditory steady-state response. *Hearing research*, 380:22–34.

REFERENCES

20

- 539 Van Canneyt, J., Wouters, J., and Francart, T. (2020a). From modulated noise to natural  
540 speech: The effect of stimulus parameters on the envelope following response. *Hearing Research*,  
541 393:107993.
- 542 Van Canneyt, J., Wouters, J., and Francart, T. (2020b). Neural tracking of the fundamental  
543 frequency of the voice: male voices preferred. *bioRxiv*.
- 544 Vanthornhout, J., Decruy, L., Wouters, J., Simon, J. Z., and Francart, T. (2018). Speech  
545 Intelligibility Predicted from Neural Entrainment of the Speech Envelope. *JARO - Journal*  
546 *of the Association for Research in Otolaryngology*, 19(2):181–191.
- 547 Verhulst, S., Altoè, A., and Vasilkov, V. (2018). Computational modeling of the human auditory  
548 periphery: auditory-nerve responses, evoked potentials and hearing loss. *Hearing Research*,  
549 360:55–75.
- 550 Zhang, X., Heinz, M. G., Bruce, I. C., and Carney, L. H. (2001). A phenomenological model for  
551 the responses of auditory-nerve fibers: I. Nonlinear tuning with compression and suppression.  
552 *The Journal of the Acoustical Society of America*, 109(2):648–670.
- 553 Zilany, M. S. A. and Bruce, I. C. (2006). Modeling auditory-nerve responses for high sound  
554 pressure levels in the normal and impaired auditory periphery. *The Journal of the Acoustical*  
555 *Society of America*, 120(3):1446–1466.
- 556 Zilany, M. S. A. and Bruce, I. C. (2007). Representation of the vowel /epsilon/ in normal and  
557 impaired auditory nerve fibers: model predictions of responses in cats. *The Journal of the*  
558 *Acoustical Society of America*, 122(1):402–417.
- 559 Zilany, M. S. A., Bruce, I. C., and Carney, L. H. (2014). Updated parameters and expanded  
560 simulation options for a model of the auditory periphery. *Journal of the Acoustical Society of*  
561 *America*, 135(1):283–286.
- 562 Zilany, M. S. A., Bruce, I. C., Nelson, P. C., and Carney, L. H. (2009). A phenomenological  
563 model of the synapse between the inner hair cell and auditory nerve: Long-term adaptation  
564 with power-law dynamics. *The Journal of the Acoustical Society of America*, 126(5):2390–2412.
